# Supplementary material for: Immobilization of trypsin via reactive polymer grafting from magnetic nanoparticles for microwave-assisted digestion
Source: Royal Society of Chemistry journal article supplement (doi:10.1039/c3tb20116c), 2013-01-01
Supplement: c3tb20116c.pdf [file c3tb20116c.pdf]

## Supporting Information

### Immobilization of trypsin via reactive polymer grafting from magnetic nanoparticles for microwave-assisted digestion

Ying Shen,<sup>a,b</sup> Wei Guo<sup>a,b</sup>, Li Qi\*<sup>a</sup>, Juan Qiao<sup>a</sup>, Fuyi Wang<sup>a</sup>, Lanqun Mao<sup>a</sup>

**Scheme S1.** Schematic diagram of microwave-assisted protein digestion by trypsin immobilized magnetic nanoparticles modified with reactive polymer.

**Figure S1.** TEM images of Fe<sub>3</sub>O<sub>4</sub>@PGMA<sub>147</sub>@ trypsin.

**Figure S2.** MALDI-TOF mass spectra of the supernatant from tryptic digestion of Cyt C (500 ng/μL, 20μL) with different incubation time at 37 °C.

**Figure S3.** MALDI-TOF mass spectra of the supernatant from tryptic digestion of Cyt C (500 ng/μL, 20μL) with different incubation time under microwave at 640 W.

**Figure S4.** MALDI-TOF MS spectra of tryptic peptides originated from Cyt C digested with trypsin-immobilized magnetic nanoparticles modified with reactive polymer (a) at 37 °C for 1 min, (b) under microwave at 640 W for 15 s.

**Table S1.** Identified Peptide Residues Digested with trypsin-immobilized magnetic nanoparticles modified with reactive polymer at 37 °C for 1 min and under microwave at 640 W for 15 s.

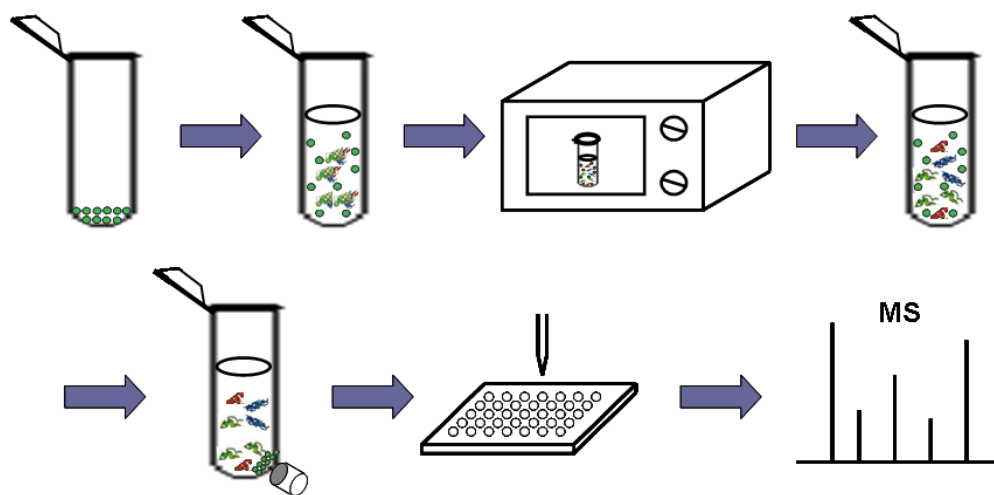

**Scheme S1**

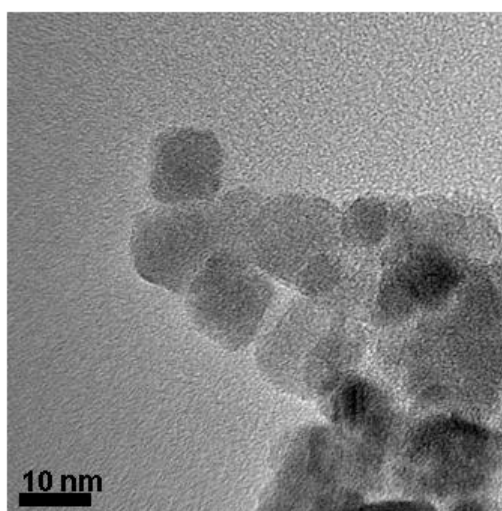

**Figure S1**

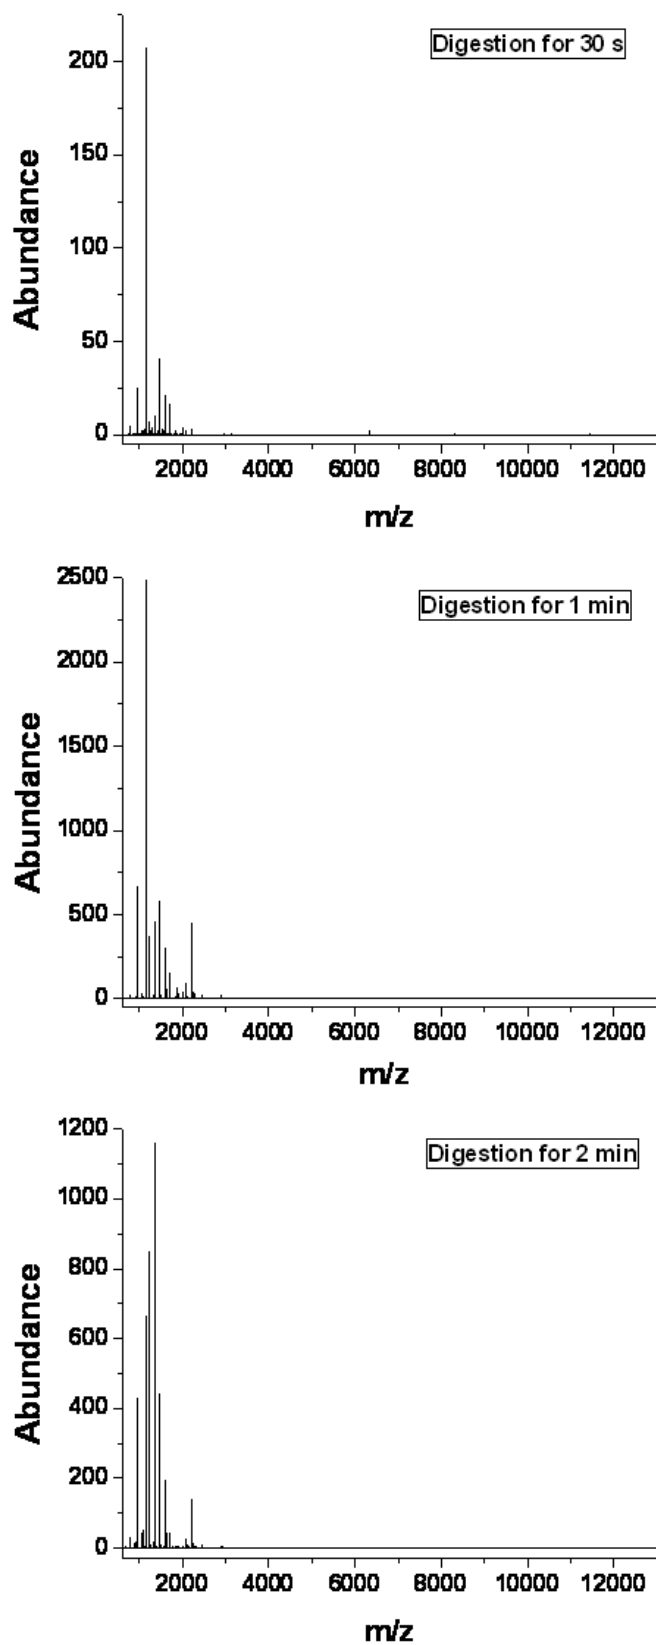

Figure S2

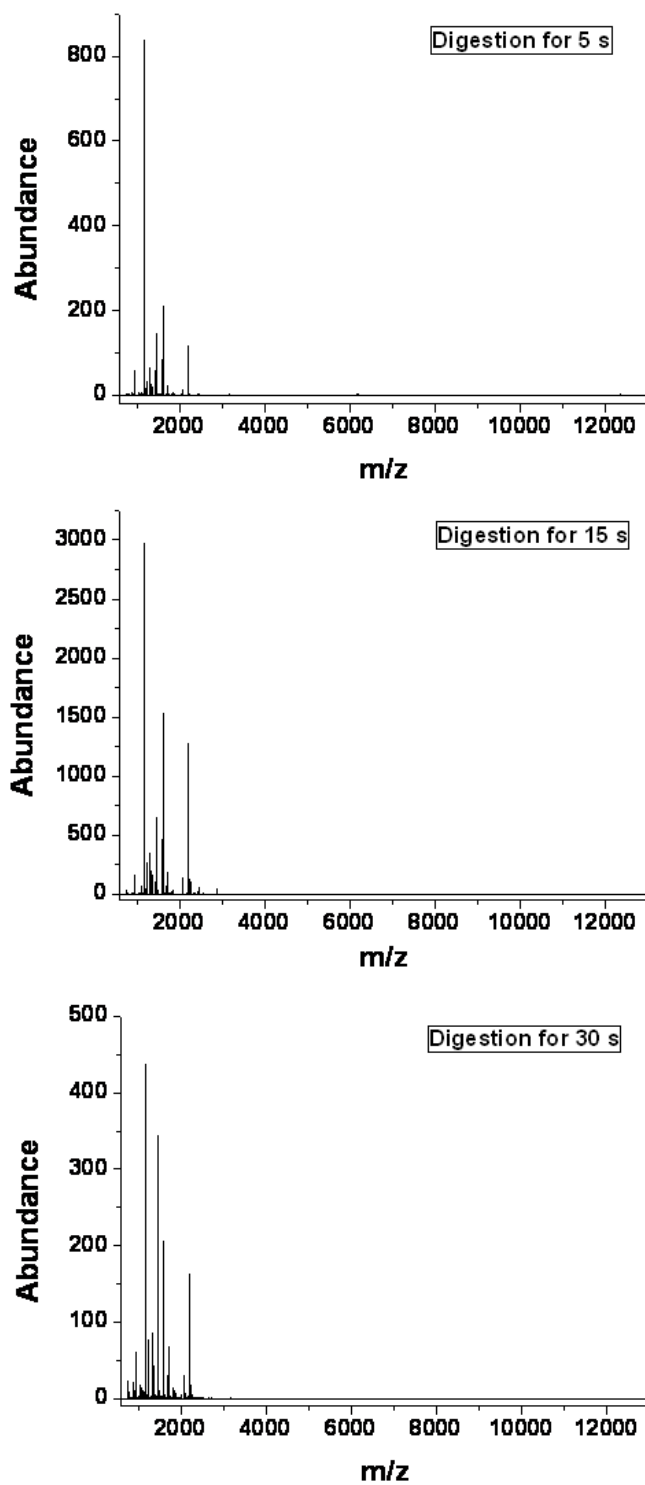

Figure S3

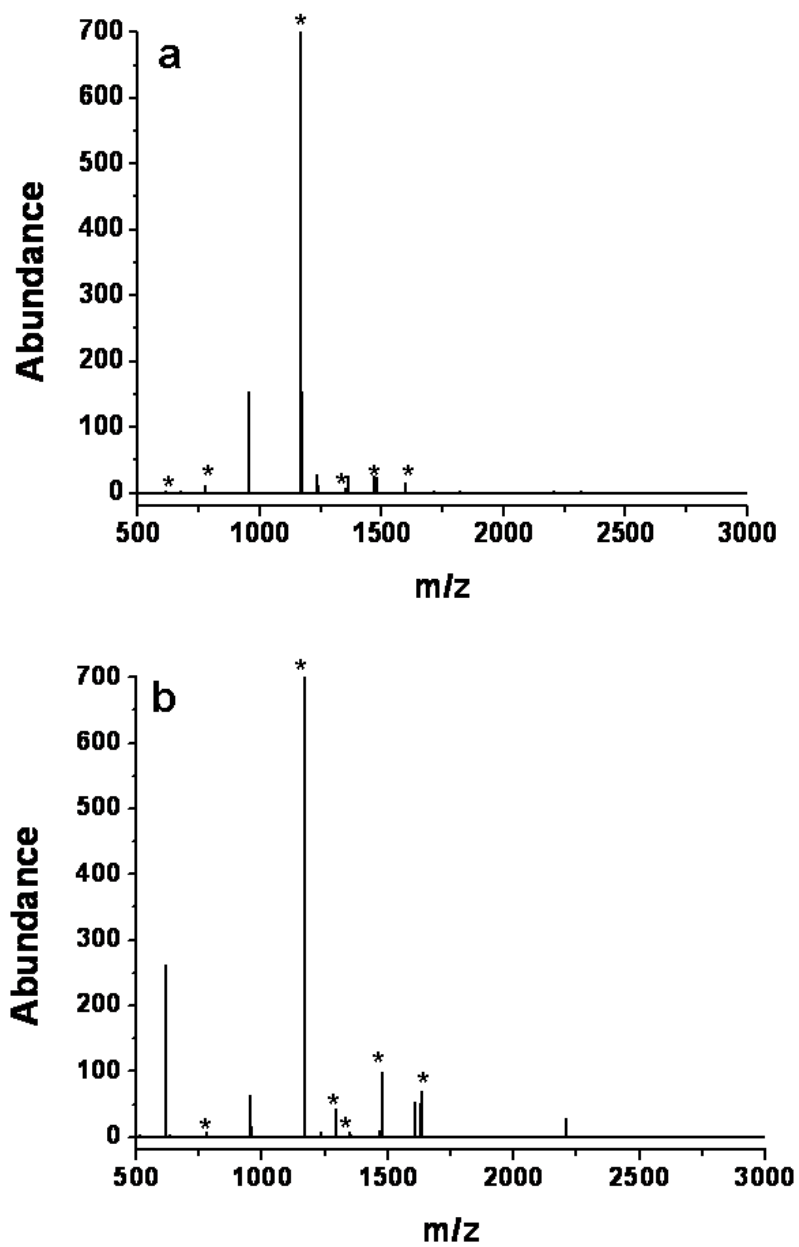

Figure S4

| protein                  |          |                 |                        |          |                 |
|--------------------------|----------|-----------------|------------------------|----------|-----------------|
| Cytochrome c             |          |                 |                        |          |                 |
| (AC P00004) <sup>a</sup> |          |                 |                        |          |                 |
| 37 °C                    |          |                 | 640 W                  |          |                 |
| position                 | MW       | MC <sup>b</sup> | position               | MW       | MC <sup>b</sup> |
| 1-6                      | 678.296  | 0               | 81-87                  | 779.395  | 0               |
| 81-87                    | 779.281  | 0               | 29-39                  | 1168.458 | 0               |
| 29-39                    | 1168.466 | 0               | 29-40                  | 1296.521 | 1               |
| 90-100                   | 1350.501 | 1               | 90-100                 | 1350.404 | 1               |
| 41-54                    | 1470.399 | 0               | 41-54                  | 1470.363 | 0               |
| 40-54                    | 1598.428 | 1               | 10-23                  | 1633.250 | 1               |
| Seq. Cov. <sup>c</sup>   | 48%      |                 | Seq. Cov. <sup>c</sup> | 55%      |                 |
| Pep. Mat. <sup>d</sup>   | 6        |                 | Pep. Mat. <sup>d</sup> | 6        |                 |

<sup>a</sup> AC, ExPASy accession number. <sup>b</sup> MC, number of missed cleavages.  
<sup>c</sup> Seq. Cov.= sequence coverage. <sup>d</sup> Pep. Mat.= peptides matched.

**Table S1**
